# Supplementary material
Source: publisher figshare collection journal article supplement (https://gsajournals.figshare.com/ndownloader/files/29869857)
Supplement: Supplementary file 1 [file 29869857]

## Sheet: Oligos
Table S1. Oligonucleotides and synthetic dsDNA fragments used in this study. All sequences are written 5’ to 3’.
Primer/DNA fragment	Description	Sequence
9	M13 (-21) sequencing primer; also used for colony PCR	TTGTAAAACGACGGCCAGT
38	M13 reverse sequencing primer; also used for colony PCR	CAGGAAACAGCTATGAC
244	T7 sequencing primer	TAATACGACTCACTATAGGG
271	Initial genotyping of chromosome II TIR1 knock-ins (anneal outside homology arms)	AGGCAGAATGTGAACAAGACTCG
272	Initial genotyping of chromosome II TIR1 knock-ins (anneal outside homology arms)	ATCGGGAGGCGAACCTAACTG
273	Genotype chromosome I TIR1 knock-ins by PCR	ACCGGAAACCAAAGGACGAGAG
274	Genotype chromosome I TIR1 knock-ins by PCR	ACGCCCAGGAGAACACGTTAG
2559	Colony PCR to identify correctly assembled TIR1 expression vectors	AGTTGGATGAAGGAGAAGACGTGC
2833	Initial genotyping of chromosome I TIR1 knock-ins (anneal outside homology arms)	gtgcaaacacttgagcttacaataacttg
2834	Initial genotyping of chromosome I TIR1 knock-ins (anneal outside homology arms)	agagtaggtggtcacgacgatg
2835	Genotype chromosome I TIR1 knock-ins by PCR	tgtcgaccgctagtgtagcttac
2836	Genotype chromosome I TIR1 knock-ins by PCR	cgtctctccacgatttacacactatttg
2975	Reverse primer for colony PCR screening pJW1582-1586; pJW1591-1595)	GTCGTCCTTGTAGTCACGCTTATCGTCATCGTCTTTATAATCcttcacgaacgccgccgc
2976	Forward primer for colony PCR screening of SEC-based vectors. Anneals in the unc-54 3'UTR and can be used to sequence out of the 3' end of the SEC.	CTCTTTCTCCCTGTGCTCCCACC
3000	gBlock: linker::AID* plus homology to the parent vector backbone	TACGTTTCAGTTTATGACCGCAATTTTTAATAACTTCGTATAGCATACATTATACGAAGTTATtttcagGGAGCCGGATCTGATTAcGGATCCGGAGGTGGCGGGatgcctaaagatccagccaaacctccggccaaggcacaagttgtgggatggccaccggtgagatcataccggaagaacgtgatggtttcctgccaaaaatcaagcggtggcccggaggcggcggcgttcgtgaagGGTGGTGGCGGTTCTGGCTCAGGATCTGATTATAAAGACGATGACGATAAGCGTGACTACAAGGACGACGACGACAAGCGTGATTACAAGGA
3003	Forward primer for amplifying linker::AID* for Gibson cloning	ACATTATACGAAGTTATtttcagGGAGCCGGATCTGATTAcGGATCCGGAGGTGGCGGGa
3004	Reverse primer for amplifying linker::AID* for Gibson cloning	CGTCCTTGTAGTCACGCTTATCGTCATCGTCTTTATAgTCAGATCCTGAGCCAGAACCGC
3037	gBlock:linker::BioTag::::AID*:: plus homology to the parent vector backbone	GGATCCGGAGGTGGCGGGATGGCTTCTTCTCTTCGTCAGATCCTCGACTCTCAGAAGATGGAGTGGCGTTCTAACGCTGGAGGATCTGGCGGAGGAGGCAGTGGTAGTGGCAGTatgcctaaagatccagccaaacctccggccaaggcacaagttgtgggatggccaccggtgagatcataccggaagaacgtgatggtttcctgccaaaaatcaagcggtggcccggaggcggcggcgttcgtgaagGGTGGTGGCGGTTCTGGCTCAGGATCT
3143	gBlock: TEV::4xGFP11::AID*::AviTag	TTGTACAAAAAAGCAGGCTGGGGACTTAATGATATTTTCGAAGCTCAAAAAATTGAATGGCATGAAGGATCTgatccagccaaacctccggccaaggcacaagttgtgggatggccaccggtgagatcataccggaagaacgtgatggtttcctgccaaaaatcaagcggtggcccggaggcggcggcgttcgtgaagggtggctcgggaggtcgagaccatatggtgcttcacgagtatgtcaacgcagcgggcatcacaggcggatctggcggtcgtgatcatatggttttgcatgagtacgtgaacgctgcaggcatcaccggaggaagcggtggtagagatcatatggtacttcatgagtatgttaatgcggctggcattactggcggcagcgga…
3146	attB1/B2+SapI extension-F	GGGGACAAGTTTGTACAAAAAAGCAGGCTGCTCTTC
3147	attB1/B2+SapI extension-R	GGGGACCACTTTGTACAAGAAAGCTGGGTGCTCTTC
3158	Forward primer for amplyfing AviTag::AID* for SapTrap CT slot	AAAAAAGCAGGCTGCTCTTCgGCGATGGGACTTAATGATATTTTCGAAGCTCAAAAA
3159	Reverse primer for amplyfing AviTag::AID* for SapTrap CT slot	AAGAAAGCTGGGTGCTCTTCgCATacctcccgagccacccttcac
3164	Forward primer for amplyfing linker::AID*::AviTag for SapTrap NT slot	AAGCAGGCTGCTCTTCgGGTggaggctcaggtggagatcc
3165	Reverse primer for amplyfing linker::AID*::AviTag for SapTrap NT slot	CAAGAAAGCTGGGTGCTCTTCgCGTTTCATGCCATTCAATTTTTTGAGCT
3166	Forward primer for amplifying linker ::AID*::3xFLAG for Gateway cloning	AAAAAAGCAGGCTGCTCTTCgGGTGGCGGAGGAGGCAGTGGT
3167	Reverse primer for amplifying linker ::AID*::3xFLAG for Gateway cloning	CAAGAAAGCTGGGTGCTCTTCgCGTTCTCTTGTCATCGTCATCCTTGTAA
3415	Genotype chromosome I and chromosome II TIR1 knock-ins by PCR	CTGGCCGTCGTTTTACAGGA
3496	lin-42 SapTrap 5' arm-F to make pJW1749	GGCTGCTCTTCgTGGAAACGCCTATCCGACGATGT
3497	lin-42 SapTrap 5' arm (PAM mut)-R to make pJW1749	CGTCTTCCCGAAAACTTCCTCAagtagtTCTCTCCTAATGCTACGGGATTCTCAGAATGCGcGAAGAGCACCC
3498	lin-42 SapTrap 3' arm-F to make pJW1749	GGCTGCTCTTCgACGTAAtaagctactgcccaatttttctttca
3499	lin-42 SapTrap 3' arm-R to make pJW1749	GGGTGCTCTTCgTACgggggcggctataaatgtga
3516	nhr-67 SapTrap 5' arm-F to make pJW1748	GGCTGCTCTTCgTGGacgctctagtaccatctttcct
3517	nhr-67 SapTrap 5' arm (PAM mut)-R to make pJW1748	GGGTGCTCTTCgCGCgacttcttcaacattaacactctcttcttc
3518	nhr-67 SapTrap 3' arm-F to make pJW1748	GGCTGCTCTTCgACGtagatagtaaattcatgtttcatatacagtaactc
3519	nhr-67 SapTrap 3' arm-R to make pJW1748	GGGTGCTCTTCgTACaaagggggaaatcagtcagc
3520	nhr-67sgRNA-F for SapTrap cloning to generate pJW1748	TTGagagagtgttaatgttgaag
3521	nhr-67 sgRNA-R for SapTrap cloning to generate pJW1748	AACcttcaacattaacactctct
3636	gBlock: linker::BioTag::AID*::3xFLAG for SapTrap NT slot	GCTGGGTCCTAGCTCTTCgGGTggcggcagcggaggaGAGAATCTGTACTTTCAATCCGGATCCGGAGGTGGCGGGATGGCTTCTTCTCTTCGTCAGATCCTCGACTCTCAGAAGATGGAGTGGCGTTCTAACGCTGGAGGATCTGGCGGAGGAGGCAGTGGTAGTGGCAGTatgcctaaagatccagccaaacctccggccaaggcacaagttgtgggatggccaccggtgagatcataccggaagaacgtgatggtttcctgccaaaaatcaagcggtggcccggaggcggcggcgttcgtgaagGGTGGTGGCGGTTCTGGCTCAGGATCTGACTACAAAGACCATGACGGTGATTATAAAGATCATGATATCGATTACAAGGATGACGATGACAA…
3639	Forward primers for amplifying linker::BioTag::AID*::3xFLAG for SapTrap NT slot	GGGTCCTAGCTCTTCgGCGggcggcagcggaggaG
3640	Forward primers for amplifying linker::BioTag::AID*::3xFLAG for SapTrap CT slot	GAAAGCTGGGTCGCTCTTCgCATCTTGTCATCGTCATCCTTGTAATCGATATC
3771	gBlock: TEV::AID*::3xFLAG for SapTrap NT slot	GCTGGGTCCTAGCTCTTCgGGTggcggcagcggaggaGAGAATCTGTACTTTCAATCCGGATCCGGAGGTGGCGGGatgcctaaagatccagccaaacctccggccaaggcacaagttgtgggatggccaccggtgagatcataccggaagaacgtgatggtttcctgccaaaaatcaagcggtggcccggaggcggcggcgttcgtgaagGGTGGTGGCGGTTCTGGCTCAGGATCTGACTACAAAGACCATGACGGTGATTATAAAGATCATGATATCGATTACAAGGATGACGATGACAAGACGcGAAGAGCGACCCAGCT
3772	gBlock: 30 amino acid flexible linker for SapTrap CT slot	CTTTCCTGCGTTATCCCCTGATTCTGTGGCTCTTCgGCGGGTGGCGGTGGATCGGGAGGAGGAGGTTCGGGTGGCGGAGGCAGTGGAGGTGGCGGAAGTGGCGGCGGTGGTTCAGGAGGAGGCGGATCCATGcGAAGAGCGTTTGATGCCTGGCAGTTTATGGCGGG
3777	Forward primer for TOPO Blunt cloning a 30 amino acid flexible linker for the SapTrap NT slot	ATTCTGTGGCTCTTCgGGTGGTGGCGGTGGATCGGG
3778	Reverse primer for TOPO Blunt cloning a 30 amino acid flexible linker for the SapTrap NT slot	CATCAAACGCTCTTCGCGTGGATCCGCCTCCTCCTGAAC
3813	Forward primer to amplify mex-5 promoter (cloned to pDD356 or pDD357)	TCATCCtgtaaaacgacggccagtgcatgcaaatatcagtttttaaaaaattaaaccataaaaca
3814	Reverse primer to amplify mex-5 promoter (cloned to pDD356 or pDD357)	CTTCTGGAAACGACAAGGCGATTCTCTTTTGCATtctctgtctgaaacattcaattgatt
3853	Forward primer mScarlet-I (GLO) SapI site removal fragment 1	GTACAAAAAAGCAGGCTGCTCTTCgATGGTCTCCAAAGGAGAAGCTG
3854	Reverse primer mScarlet-I (GLO) SapI site removal fragment 1	cttacCTCCGTCCTTGAGGCGtAacGCCATTTTGATGTCTCCCTTGAGAAC
3855	Forward primer mScarlet-I (GLO) SapI site removal fragment 2	GTTCTCAAGGGAGACATCAAAATGGCgtTaCGCCTCAAGGACGGAGgtaag
3856	Reverse primer mScarlet-I (GLO) SapI site removal fragment 2	ACAAGAAAGCTGGGTGCTCTTCgCTTGTACAGCTCGTCCATTCCTCCGG
3912	Forward primer for amplifying linker ::3xMyc for SapTrap CT slot	GAAAGCTGGGTCCTAGCTCTTCgGCGGGAGCCGGATCTGAACAAAAAC
3913	Reverse primer for amplifying linker ::3xMyc for SapTrap CT slot	AAGAAAGCTGGGTCGCTCTTCgCATCAAGTCTTCCTCGCTGATCAAC
3914	Forward primer for amplifying linker ::3xMyc for SapTrap NT slot	AAGAAAGCTGGGTCCTAGCTCTTCgGGTGGAGCCGGATCTGAACAAAAAC
3915	Reverse primer for amplifying linker ::3xMyc for SapTrap NT slot	CAAGAAAGCTGGGTCGCTCTTCgCGTCAAGTCTTCCTCGCTGATCAACTTC
3918	spe-44 5' homology arm-F	GGCTGCTCTTCgTGGGTGCACGCCATTCAATGATA
3919	spe-44 5' homology arm-R	GGGTGCTCTTCgCGCTTGAATATGACTAGATCCTGGAAG
3920	spe-44 3' homology arm-F	GGCTGCTCTTCgACGTAATTAAACAATTACGGATTTAATCCAC
3921	spe-44 5' homology arm-R	GGGTGCTCTTCgTACTGGCGAGACCCTACAGTAAT
3972	Forward primer for linearizing pDONR221 for Gibson cloning	GCCATCCAGCTGATATCCCCTATAGTGAGTCG
3973	Reverse primer for linearizing pDONR221 for Gibson cloning	ATTATTTGGGGCCCGAGCTTAAGACTGG
3996	Forward primer for Gibson cloning multicassette. Homology to 5' end 30 amino acid linker	GCCAGTCTTAAGCTCGGGCCCCAAATAATGCTCTTCgGCGGGTGGCGGTGGATCGGGAGG
3997	Reverse primer for Gibson cloning multicassette. Homology to 3' end of 3xFLAG cassette	TATAGGGGATATCAGCTGGATGGCGCTCTTCgCGTCTTGTCATCGTCATCCTTGTAATCGATATC
3998	Q5 site-directed mutagenesis of pMLS134 to generate pJW1838	TATTTAAACTTGCTATGCTGTTTCCAGCATAGCTCTTAAACCGAAGAGCccatggatccG
3999	Q5 site-directed mutagenesis of pMLS134 to generate pJW1838	AGGCTAGTCCGTTATCAACTTGAAAAAGTGGCACCGAGTCGGTGCtttttttc
4000	Forward primer to linearize pMLS134 for Gibson assembly of pJW1839	gaattcactggccgtcgttttacaac
4000	lin-42 sgRNA-F for SapTrap cloning to generate pJW1749	TTGccgtagcattaggagagagg
4001	Reverse primer to linearize pMLS134 for Gibson assembly of pJW1839	aagcttggcgtaatcatggtcatagc
4001	lin-42 sgRNA-R for SapTrap cloning to generate pJW1749	AACcctctctcctaatgctacgg
4002	Forward primer to amplify R07E5.16 U6 promoter for Gibson assembly of pJW1839	gttgtaaaacgacggccagtgaattccaaaaaaaactagcaataaaggaataaaaaactg
4003	Reverse primer to amplify R07E5.16 U6 promoter for Gibson assembly of pJW1839	GCTCTTAAACCGAAGAGCccatggatccGCTCTTCGCaagacatctcgcaataggaggtg
4004	Forward primer to amplify sgRNA (F+E) for Gibson assembly of pJW1839	gatgtcttGCGAAGAGCggatccatggGCTCTTCGGTTTAAGAGCTATGCTGGAAACAGC
4005	Reverse primer to amplify sgRNA (F+E) for Gibson assembly of pJW1839	aacagctatgaccatgattacgccaagcttccattcgccattcaggctgc
4067	Forward primer to amplify eft-3 promoter (cloned to pDD356 or pDD357)	GATCATCCtgtaaaacgacggccagtgcatgcCACCTTTGGTCTTTTATTGTCAACTTCC
4068	Reverse primer to amplify eft-3 promoter (cloned to pDD356 or pDD357)	TTCTTCTGGAAACGACAAGGCGATTCTCTTTTGCATGAGCAAAGTGTTTCCCAACTGAAA
4111	Reverse primer for Gibson cloning multicassette. Homology to 3' end of 3xMyc cassette	CTCACTATAGGGGATATCAGCTGGATGGCGCTCTTCgCGTCAAGTCTTCCTCGCTGATCAACTTC
4128	Reverse primer for amplifying GFP cassettes for Gibson cloning	ACTATAGGGGATATCAGCTGGATGGCGCTCTTCgCTTGTAGAGCTCGTCCATTCCGTGGG
4130	Reverse primer for amplifying germline optimized mScarlet-I cassettes for Gibson cloning	ACTATAGGGGATATCAGCTGGATGGCGCTCTTCgCTTGTACAGCTCGTCCATTCCTCCGG
4137	SV40 NLS::mScarlet-I (dpi)::PEST::tbb-2 3’UTR dsDNA fragment	atgccaaagaagaagcgtaaggtcctgcagATGGTCTCCAAGGGAGAGGCTGTCATCAAGGAGTTCATGCGTTTCAAGGTCCACATGGAGGGATCCATGAACGGACACGAGTTCGAGATCGAGGGAGAGGGAGAGGGACGTCCATACGAGGGAACCCAAACCGCCAAGCTCAAGGTCACCAAGGGAGgtaagtttgtgataatccaatttcaattcgcaatggtcatcgttttttcagGACCACTCCCATTCTCCTGGGACATCCTCTCCCCACAATTCATGTACGGATCCCGTGCCTTCATCAAGCACCCAGCCGACATCCCAGACTACTACAAGCAATCCTTCCCAGAGGGATTCAAGTGGGAGCGTGTGATGAACTTCGAGgtaagtttttactcc…
4145	Forward primer for amplifying SV40 NLS::mScarlet-I (dpi)::PEST::tbb-2	ACGACGGCCAGTCTTAAGCTCGGGCCCCAAATAATatgccaaagaagaagcgtaaggtcc
4146	Reverse primer for amplifying SV40 NLS::mScarlet-I (dpi)::PEST::tbb-2	TAATACGACTCACTATAGGGGATATCAGCTGGATGGCtgagacttttttcttggcggcac
4147	Forward primer for deleting PEST sequence in pJW1836	agaagggaatgcttgaaaggattttgcatttatcTTACTTGTAGAGCTCGTCCATTCCTC
4148	Forward primer for deleting PEST sequence in pJW1841	GTAAgataaatgcaaaatcctttcaagcattccc
4605	Forward primer for linearizing pJW1836 or pJW1841	atgccaaagaagaagcgtaaggtcc
4606	Reverse primer for linearizing pJW1836 or pJW1841	ATTATTTGGGGCCCGAGCTTAAGAC
4643	Forward primer for PCR amplifying SCMmin promoter from pJM30	CAGTCTTAAGCTCGGGCCCCAAATAATctagttcacagtggtggtttcggagagtttgaccaaaaaagacgg
4644	Reverse primer for PCR amplifying SCMmin promoter from pJM30	CAACGCTCGTAATTTGCAAAAAATCGATCtggacttcacaatctccgctcaagacaggtgagtg
4645	Forward primer for amplifying pes-10D minimal promoter	GGCCAGTCTTAAGCTCGGGCCCCAAATAATgatcgattttttgcaaattacgagcgttgt
4646	Reverse primer for amplifying pes-10D minimal promoter	GGACCTTACGCTTCTTCTTTGGCATtttttctgagctcggtaccctcca
4739	Forward primer to amplify dpy-7 promoter (cloned to pDD356 or pDD357)	CCTGTAAAACGACGGCCAGTGCATGaatctcattccacgatttctcgca
4740	Reverse primer to amplify dpy-7 promoter (cloned to pDD356 or pDD357)	CGACAAGGCGATTCTCTTTTGCATCGcatttatctggaacaaaatgtaagaatattcttaaaaat
4754	Forward primer to amplify SCM enhancer pes-10D minimal promoter (cloned to pDD356 or pDD357)	CTGTAAAACGACGGCCAGTGCATGctagttcacagtggtggtttcggagagttt
4755	Reverse primer to amplify SCM enhancer pes-10D minimal promoter (cloned to pDD356 or pDD357)	ACAAGGCGATTCTCTTTTGCATCGtgcctgaaagttaaaaattacagtataaagataagggaa
5171	Forward primer to linearize pDONR221 and add linker	CCGCCACCCGAACCTCCTCCTCCCGATCCACCGCCACCGGGGCCCGAGCTTAAGACTGGC
5172	Reverse primer to linearize pDONR221 and add linker	GGAGCATCGGGAGCCTCAGGAGCATCGTCCGGAGGCGCCATCCAGCTGATATCCCCTATAG
5173	Forward primer to amplify 30aa linker-GFP::degron::3xFLAG	AAACGACGGCCAGTCTTAAGCTCGGGCCCCGGTGGCGGTGGATCGGGAGG
5174	Forward primer to amplify 30aa linker-GFP::degron::3xFLAG	TCCGGACGATGCTCCTGAGGCTCCCGATGCTCCCTTGTCATCGTCATCCTTGTAATCGATATCATG
5176	Forward primer for removing intron containing LoxP to generate pJW2086	CTTGTAGAGCTCGTCCATTCCGTGG
5177	Reverse primer for removing intron containing LoxP to generate pJW2086	ggcggcagcggaggaGAGAATC
5178	Forward primer for removing AID* cassette to generate pJW2088	CCCGCCACCTCCGGATCC
5179	Reverse primer for removing AID* cassette to generate pJW2088	GGTGGTGGCGGTTCTGGCTC
5187	Forward primer for cloning GFP multicassettes	AAACGACGGCCAGTCTTAAGCTCGGGCCCCAAATAATGCTCTTCgATGAGTAAAGGAGAAGAATTGTTCACTGG
5220	Reverse primer, amplify mScarlet-I (GLO) wtith 3xMyc homology	AGAAATAAGTTTTTGTTCAGATCCGGCTCCCTTGTACAGCTCGTCCATTCCTCCGG
5221	Forward primer for amplifying 3xMyc with mScarlet-I (GLO) and linker homology	CGTCATTCGACCGGAGGAATGGACGAGCTGTACAAGGGAGCCGGATCTGAACAAAAACTTATTTC
5222	Reverse primer for amplifying 3xMyc with mScarlet-I (GLO) and linker homology	GCCTCCGGACGATGCTCCTGAGGCTCCCGATGCTCCCAAGTCTTCCTCGCTGATCAACTTCTGC
5583	mScarlet-I (GLO) site-directed mutagenesis to fix SapI site. From NEBase Changer	TCAAAATGGCgttaCGCCTCAAGGAC
5584	mScarlet-I (GLO) site-directed mutagenesis to fix SapI site. From NEBase Changer	TGTCTCCCTTGAGAACTC
5588	mNeonGreen frag 1 F/R to make pJW2171 and pJW2172	agtggcggcggtggttcaggaggaggcggatccATGGTCTCCAAGGGAGAGGAGG
5589	mNeonGreen frag 1 F/R to make pJW2171 and pJW2172	ctgaaaatttaaatatgtatggttagttagtaccgaac
5590	mNeonGreen frag 2 F/R to make pJW2171 and pJW2172	taagtttaaacagttcggtactaactaaccatacatatttaaattttcagGGAGAGGCCC
5591	mNeonGreen frag 2 F/R to make pJW2171 and pJW2172	aaagtacagattctctcctccgctgccgccCTTGTAGAGCTCGTCCATTCCC
5592	mScarlet linker deletion in SEC vector to make pJW1821 and pJW1927 by Q5 mutagenesis	CGAAGAGCATTATTTGGG
5593	mScarlet linker deletion in SEC vector to make pJW1821 and pJW1927 by Q5 mutagenesis	ATGGTCTCCAAAGGAGAAG
5612	Clone mScarlet (dpi) into linearized pJW2086 to make pJW2098	ggcggcggtggttcaggaggaggcggatccATGGTCTCCAAGGGAGAGGC
5613	Clone mScarlet (dpi) into linearized pJW2086 to make pJW2098	aaagtacagattctctcctccgctgccgccCTTGTAGAGCTCGTCCATTCCTCC
DD1000	Cloning AID* downstream of mTagBFP2::C1 (pDD356 and pDD357 construction)	CTCCCATCCAAGCTCGGACACAAGCTCAACCCTAAAGATCCAGCCAAACC
DD1001	Adding an NLS to AID* and cloning into pAP087/pAP088 (pDD356 and pDD357 construction)	gggaatgcttgaaaggattttgcatttatcTTAGTCGAGCTTGACACGCTTGGCGGCTGGTTTCACGAACGCCGC
DD995	Cloning the sun-1 promoter into pAP087 and pAP088 (pDD367 and pDD357 construction)	CATCCtgtaaaacgacggccagtgcatgcatttttattactaaaatcagtttctaaaatg
DD996	Cloning the sun-1 promoter upstream of codon-optimized TIR1 (pDD367 and pDD357 construction)	TGGAAACGACAAGGCGATTCTCTTTTGCATcgataccgagtagatctgga
DD997	Amplifying codon-optimized TIR1 (pDD367 and pDD357 construction)	ATGCAAAAGAGAATCGCCT
DD998	Amplifying codon-optimized TIR1 (pDD367 and pDD357 construction)	GAGTCCGTTGGTGGTG
DD999	Codon-optimized F2A::mTagBFP2 synthetic fragment	TCCCGTCAAATCATCACCACCAACGGACTCGGAGGAGGAGGATCCCCAGTCAAGCAAACCCTCAACTTCGACCTCCTCAAGCTCGCCGGAGACGTCGAGTCCAACCCAGGACCAATGGTTTCGGAATTGATTAAGGAAAATATGCACATGAAGCTCTACATGGAGGGAACCGTCGACAACCACCACTTCAAGTGCACCTCCGAGGGAGAGGGAAAGCCATACGAGGGAACCCAAACCATGCGTATCAAGGTCGTCGAGGGAGGACCACTCCCATTCGCCTTCGACATCCTCGCCACCTCCTTCCTCTACGGATCCAAGgtaagtttaaacatatatatactaactaaccctgattatttaaattttcagACCTTCATCAACCACACCCAAGGAATCCCA…
DQM515	Colony PCR to identify pWZ179	TGGTCCTGGGTTGGACTC
DQM757	Forward primer to amplify cdh-3 promoter (cloned to pDD356 or pDD357)	cctgtaaaacgacggccagtgcatgCTCATATCGAAGGTTCTGGTGTC
DQM758	Reverse primer to amplify cdh-3 promoter (cloned to pDD356 or pDD357)	acgacaaggcgattctcttttgcatCTATTCAGCATTGATCTGGAAAATTC
myo-2-F	Forward primer to amplify myo-2 promoter (cloned to pDD356)
myo-2-R	Reverse primer to amplify myo-2 promoter (cloned to pDD356)
myo-3-F	Forward primer to amplify myo-3 promoter (cloned to pDD356)	GCGTCGATCATCCtgtaaaacgacggccagtgcataaggctgcaacaaagatcagg
myo-3-R	Reverse primer to amplify myo-3promoter (cloned to pDD356)	TCTGGAAACGACAAGGCGATTCTCTTTTGCATttctagatggatctagtggtcgtg
TD344	Forward primer to amplify ges-1 promoter (cloned to pDD356 or pDD357)	GTCGATCATCCtgtaaaacgacggccagtgcatgaactcgactttaatattcttttctgg
TD345	Reverse primer to amplify ges-1 promoter (cloned to pDD356 or pDD357)	CTTCTGGAAACGACAAGGCGATTCTCTTTTGCATctgaattcaaagataagatatgtaa
TD346	Forward primer to amplify rgef-1 promoter (cloned to pDD356 or pDD357)	GTCGATCATCCtgtaaaacgacggccagtgcatgaccgtatttcctctattaatcttgc
TD347	Reverse primer to amplify rgef-1 promoter (cloned to pDD356)	CTTCTGGAAACGACAAGGCGATTCTCTTTTGCAT cgtcgtcgtcgtcgatgc
TD348	Forward primer to amplify unc-54 promoter (cloned to pDD356 or pDD357)	GTCGATCATCCtgtaaaacgacggccagtgcatggaccgac cgtactctctga
TD349	Reverse primer to amplify unc-54 promoter (cloned to pDD356 or pDD357)	CTTCTGGAAACGACAAGGCGATTCTCTTTTGCAT gatttctcgcttctttcaaatgg
TD350	Forward primer to amplify col-10 promoter (cloned to pDD356 or pDD357)	GTCGATCATCCtgtaaaacgacggccagtgcatggatcttcatc ccttcaacatttgg
TD351	Reverse primer to amplify col-10 promoter (cloned to pDD356 or pDD357)	CTTCTGGAAACGACAAGGCGATTCTCTTTTGCAT GACTGAAAGTAAGCCAGGTACCTT
TD359	Mutagenesis primer for LGI site sgRNA	gaaatcgccgacttgcgaggGTTTAAGAGCTATGCTGGAAACAG
TD360	Mutagenesis primer for LGII site sgRNA	atatcagtctgtttcgtaaGTTTAAGAGCTATGCTGGAAACAG
TD62	Universal primer to mutagenize sgRNA plasmid pJW1236	CAAGACATCTCGCAATAGG
vha-8-F	Forward primer to amplify vha-8 promoter (cloned to pDD356)	gcgtcgatcatcctgtaaaacgacggccagtgccaccgcgttttgcttattg
vha-8-R	Reverse primer to amplify vha-8 promoter (cloned to pDD356)	TCTGGAAACGACAAGGCGATTCTCTTTTGCATGGCTACAGTCGTTAGTGGTTTTCC
WZ118	Colony PCR to identify pWZ179	CCTCTTTTTCCCCCTCTGTC
WZ70	Primer to sequence-confirm replacement of 3' loxP site with lox2272 in pDD312 (to generate pTNM063)	AATTCTATCCCAAAATCTACACAATG
